# Supplementary material
Source: Research Square preprint supplement (doi:10.21203/rs.3.rs-9396192/v1)
Supplement: Supplementary file 1 [file 3f740fce6bf3627e9e05fd42.docx]

## Interview Guide – Perspectives of health professionals on providing person-centred care in a primary healthcare setting.

**Welcome and Greetings:**

Hello, my name is Ali. Thank you for your time this morning/afternoon. Today we are going to talk about your experiences as a healthcare professional here at the HHM.

Please note that this interview is being recorded, and that no identifiable information is being documented in any form – are you still happy to proceed?

Can you tell me how long you have worked in healthcare?

What is your healthcare profession?

How old are you?

Do you have any questions before we begin?

The interview guide has three semi- structured topics with probes for each topic.

**Topic One – Personal Experiences**

Question – In your opinion, what are essential elements of patient care in primary care?

Probes

What practices or behaviours contribute to these elements?

Why do you see these as being essential elements?

Do these factors include person-centred care?

Can you provide more details about your perceptions of patient care?

How do you think patient care is different in primary care?

**Topic Two – Factors Influencing Patient Care**

Question – What do you think are key factors that can either facilitate or hinder patient care?

Probes

Can you give examples of specific policies, practices, or behaviours that illustrate these facilitating or hindering practices?

Are these factors related directly to healthcare professionals behaviour?

How do you think your behaviour as a healthcare professional can affect the patient?

**Topic Three – Perceptions of Patient Care**

Question - How do you think healthcare professionals interactions with patients and their family impacts overall healthcare experiences?

*Potential* Question – How would you define person-centred care?

Probes

Can you describe positive or negative interactions with patients and their families that could have impacted their care?

How do you think healthcare is impacted by healthcare professionals?

What do you mean by person-centred care?

Do you see person-centred care practiced at the HHM?

Please provide examples of this.

**Final thoughts and conclusion:**

Is there anything else you would like to share or any other important aspects of patient care that we have not discussed?

**Conclusion:**

Again, thank you for your time today – it is really appreciated. Do you have any questions?
